# Supplementary material for: Discrete functional and mechanistic roles of chromodomain Y-like 2 (CDYL2) transcript variants in breast cancer growth and metastasis
Source: Theranostics. 2020 Apr 6;10(12):5242–58. doi: 10.7150/thno.43744 (PMC7196301; doi:10.7150/thno.43744)
Supplement: Supplementary file 1 — Supplementary figures and tables. [file thnov10p5242s1.pdf]

## **Supplementary Information for**

**Yang et al. Discrete functional and mechanistic roles of CDYL2 transcript variants in breast cancer growth and metastasis**

**The Supporting information contains:**

Figures S1-S17

Tables S1-S5

## Supplementary Figures and Figure legends

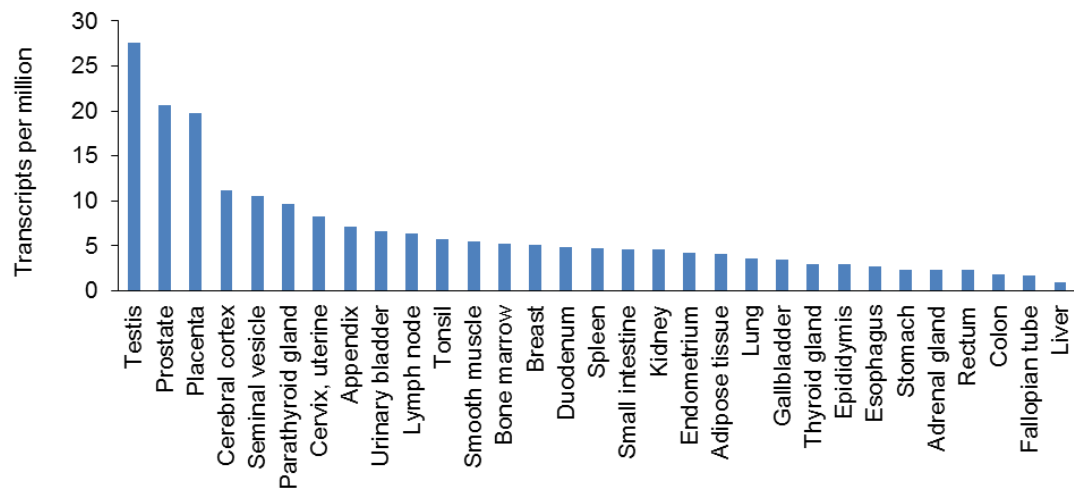

**Figure S1. CDYL2 expression profiles in human normal tissues**

The RNA expression profiles of CDYL2 in normal human tissues. Data was obtained from HPA database (<https://www.proteinatlas.org/>).

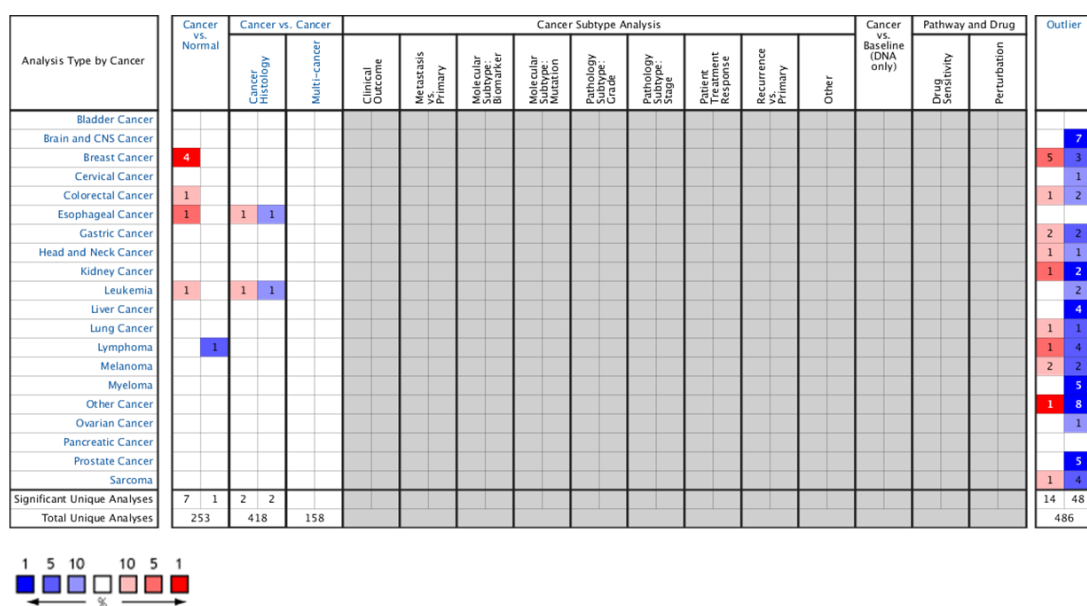

**Figure S2. An overview of CDYL2 mRNA levels in a variety of human cancer according to Oncomine database**

This graphic showed the numbers of datasets with statistically significant mRNA overexpression (red) or underexpression (blue) of CDYL2 gene (cancer vs. normal tissue). Cell color was determined by the best gene rank percentile for the analysis within the cells. The threshold was set as gene rank percentile (top 10%),  $p < 0.01$ , and fold change  $> 2$ .

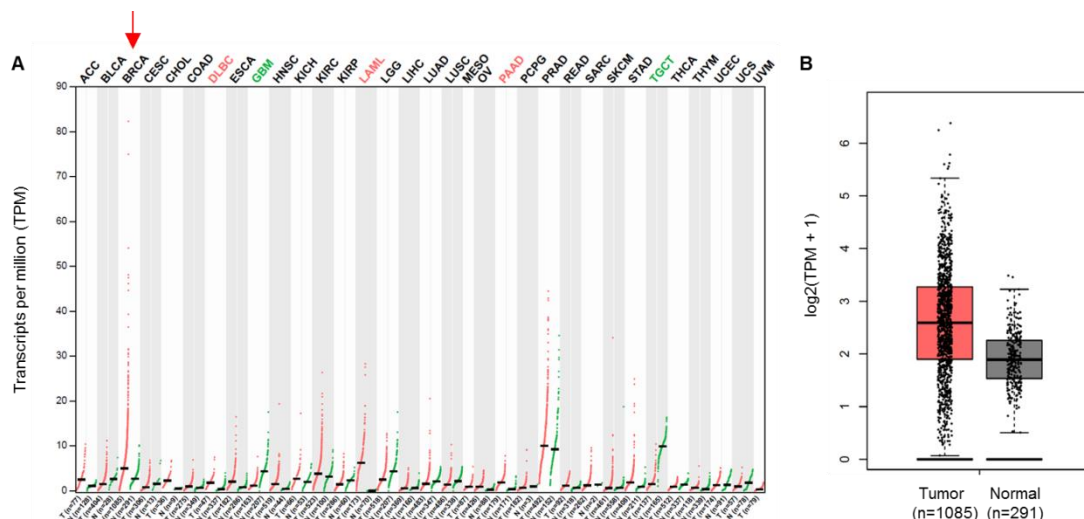

**Figure S3. Analysis of CDYL2 mRNA levels in human tumors and normal tissues using GEPIA database**

(A) The CDYL2 mRNA expression profile across all tumor (T) samples and paired normal (N) tissues. The data was generated using GEPIA database. The RNA-seq results are reported as number of transcripts per million (TPM). Each dot represents expression of sample. The red arrow indicates breast invasive carcinoma (BRCA).

Abbreviations for tumor types: ACC, adrenocortical carcinoma; BLCA, bladder Urothelial Carcinoma; BRCA, breast invasive carcinoma; CESC, cervical squamous cell carcinoma and endocervical adenocarcinoma; CHOL, cholangio carcinoma; COAD, colon adenocarcinoma; DLBC, lymphoid neoplasm diffuse large B-cell lymphoma; ESCA, esophageal carcinoma; GBM, glioblastoma multiforme; HNSC, head and neck squamous cell carcinoma; KICH, kidney chromophobe; KIRC, kidney renal clear cell carcinoma; KIRP, kidney renal papillary cell carcinoma; LAML, acute myeloid leukemia; LGG, brain lower grade glioma; LIHC, liver hepatocellular carcinoma; LUAD, lung adenocarcinoma; LUSC, lung squamous cell carcinoma; MESO, mesothelioma; OV, ovarian serous cystadenocarcinoma; PAAD, pancreatic adenocarcinoma; PCPG, pheochromocytoma and paraganglioma; PRAD, prostate adenocarcinoma; READ, rectum adenocarcinoma; SARC, sarcoma; SKCM, skin cutaneous melanoma; STAD, stomach adenocarcinoma; TGCT, testicular germ cell

tumors; THCA, thyroid carcinoma; THYM, thymoma; UCEC, uterine oorus endometrial carcinoma; UCS, uterine carcinosarcoma; UVM, uveal Melanoma.

(B) CDYL2 was up-regulated in human breast tumors. GEPIA was used for the analysis of CDYL2 expression, and the boxplot was plotted. The red and gray boxes represent breast tumors and normal breast tissues, respectively. The height of bar represents the median expression of certain tumor type or normal tissue.



(C) Relative expression levels of CDYL2 in different subtypes of breast tumors in TCGA. NS, no significance; \*\*\* $p < 0.001$ .

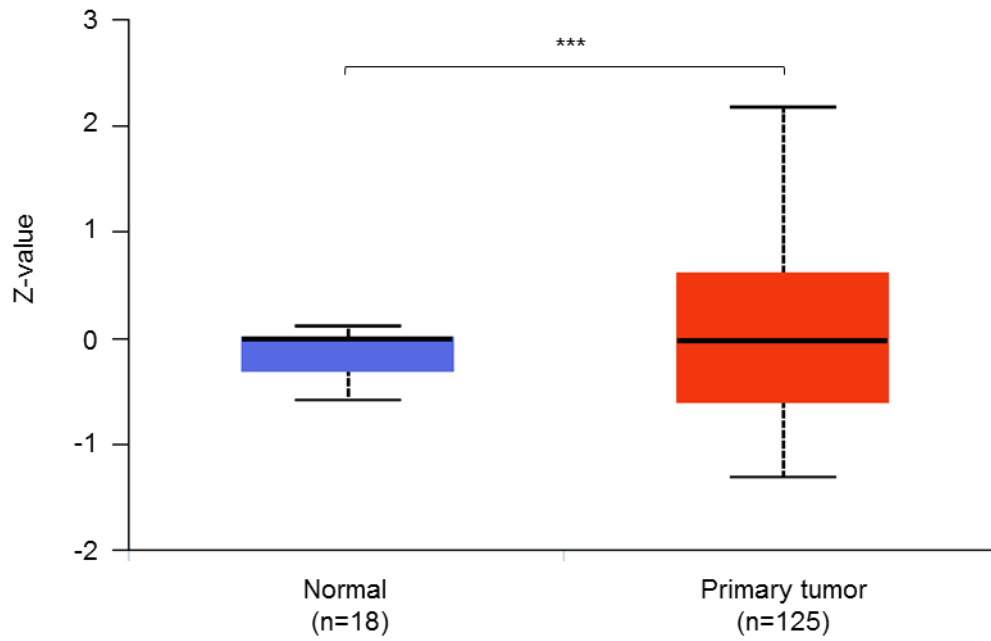

**Figure S5. Analysis of CDYL2 protein expression levels in breast tumors and normal breast tissues using CPTAC database**

Z-values represent standard deviations from the median across samples. Log2 Spectral count ratio values from CPTAC were first normalized within each sample profile and then normalized across samples. \*\*\* $p < 0.001$ .

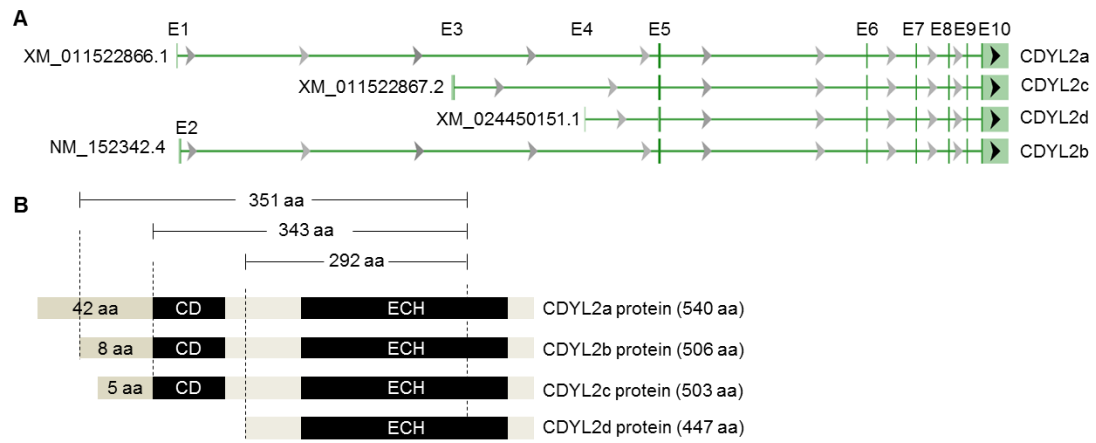

**Figure S6. Human CDYL2 pre-mRNA generates four transcript variants**

(A) Schematic representation of four CDYL2 transcription variants.

(B) Schematic representation of four CDYL2 protein isoforms.

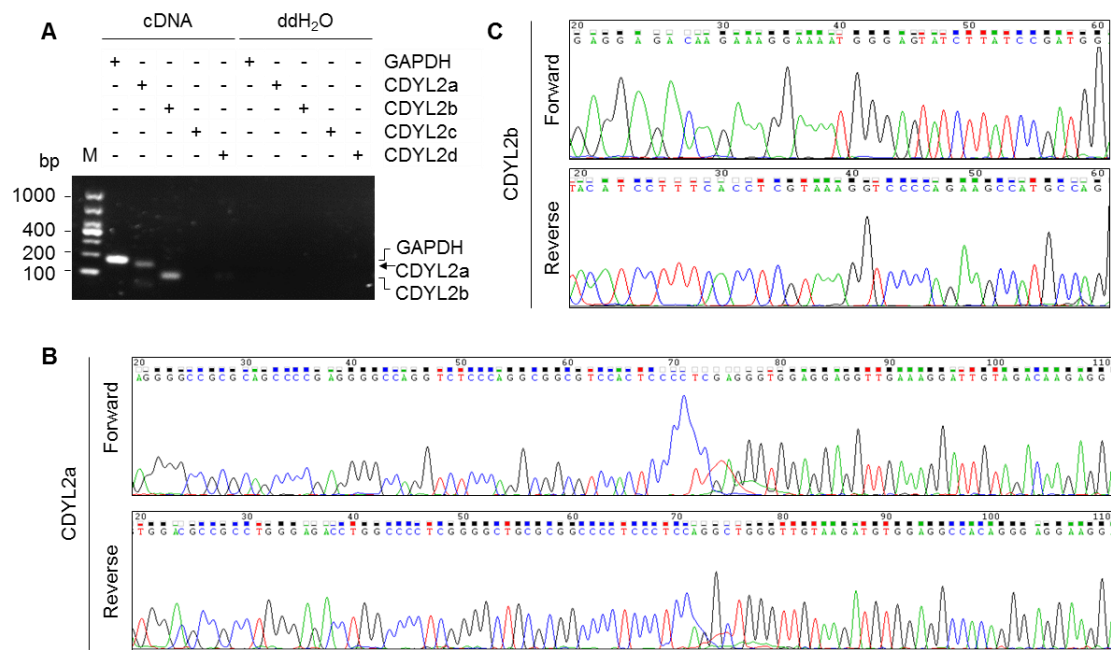

**Figure S7. CDYL2a and CDYL2b are the predominant isoforms expressed in MCF-7 breast cancer cell line**

(A) RT-PCR analysis of the expression levels of four CDYL2 variants in MCF-7 cells. GAPDH was used as a positive control.

(B-C) Sequencing of the PCR products from A.

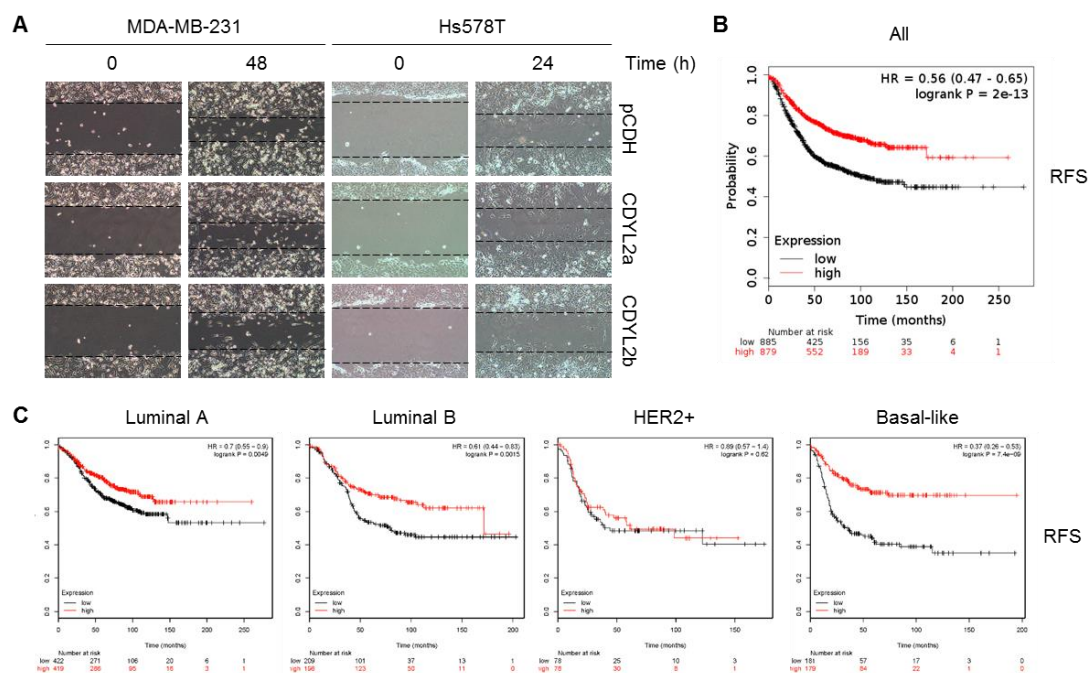

**Figure S8. CDYL2b suppresses breast cancer cell migratory potential and its expression levels are negatively associated with prognosis of patients with breast cancer**

(A) MDA-MB-231 and Hs578T cells stably expressing pCDH, Flag-CDYL2a, or Flag-CDYL2b were subjected to wound-healing assays. The corresponding quantitative results are shown in Fig. 2H.

(B-C) Kaplan-Meier curves of relapse-free survival (RFS) of breast cancer patients with high or low CDYL2 expression in Kaplan-Meier plotter database.

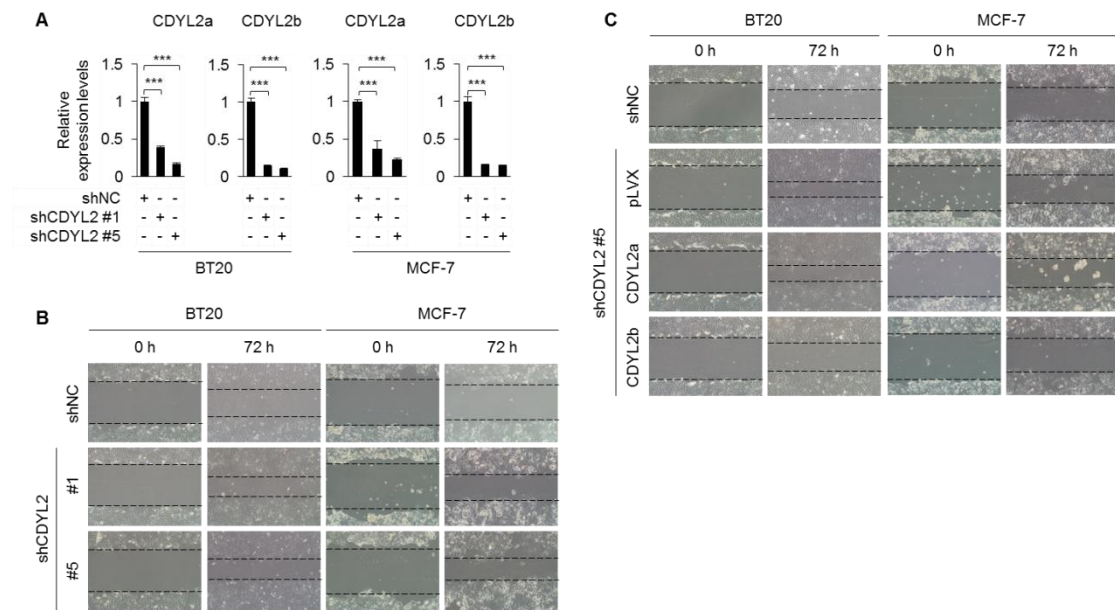

**Figure S9. CDYL2 suppresses breast cancer cell migratory potential**

(A) qPCR analysis of CDYL2 expression in BT20 and MCF-7 cells stably expressing shNC, shCDYL2 #1, or shCDYL2 #5. \*\*\* $p < 0.001$ .

(B) BT20 and MCF-7 cells stably expressing shNC, shCDYL2 #1, or shCDYL2 #5 were subjected to wound-healing assays. The corresponding quantitative results are shown in Fig. 3I.

(C) CDYL2-depleted BT20 and MCF-7 cells were reconstituted with Flag-CDYL2a and Flag-CDYL2b and then subjected to wound-healing assays. The corresponding quantitative results are shown in Fig. 3L.

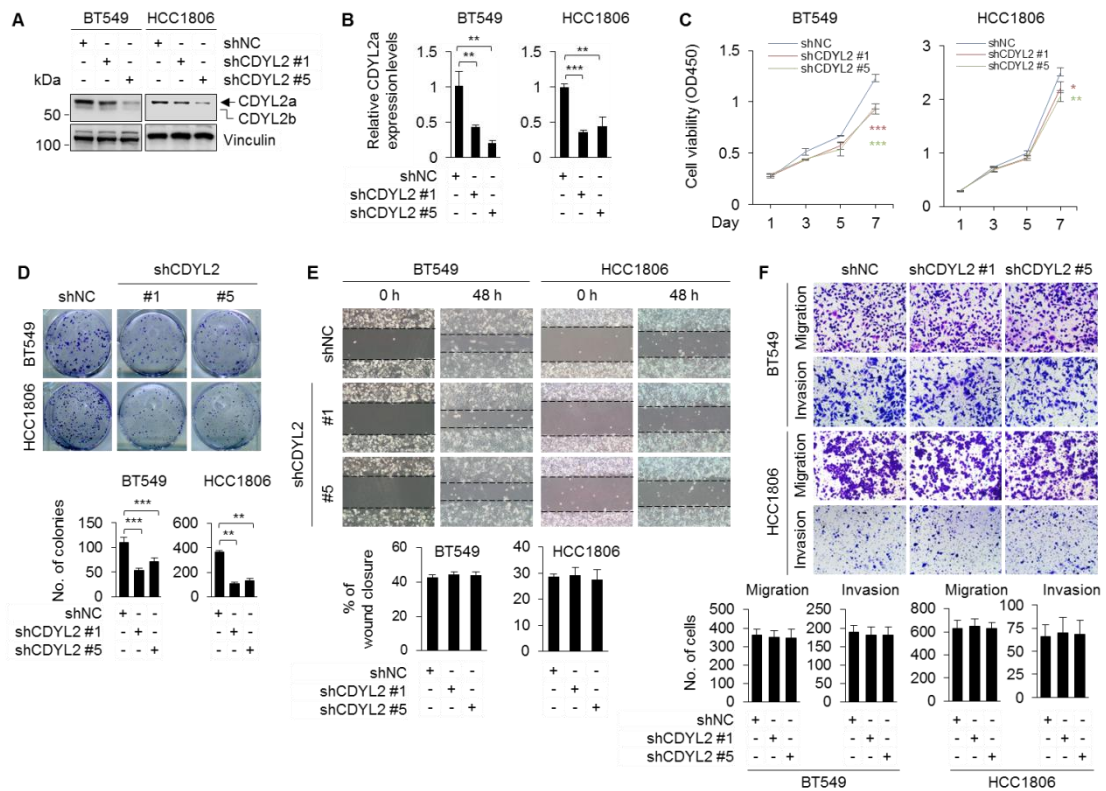

**Figure S10. CDYL2a promotes breast cancer cell proliferation and colony formation**

(A-B) Immunoblotting (A) and qPCR (B) analysis of CDYL2a expression in BT549 and HCC1806 cells stably expressing shNC, shCDYL2 #1, or shCDYL2 #5.

(C-F) BT549 and HCC1806 cells stably expressing shNC, shCDYL2#1, or shCDYL2#5 were subjected to cell proliferation assays using CCK-8 kit (C), colony formation assays (D), wound-healing assays (E), Boyden's chamber migration assays, and Matrigel-coated invasion assays (F). \* $p < 0.05$ ; \*\* $p < 0.01$ ; \*\*\* $p < 0.001$ .

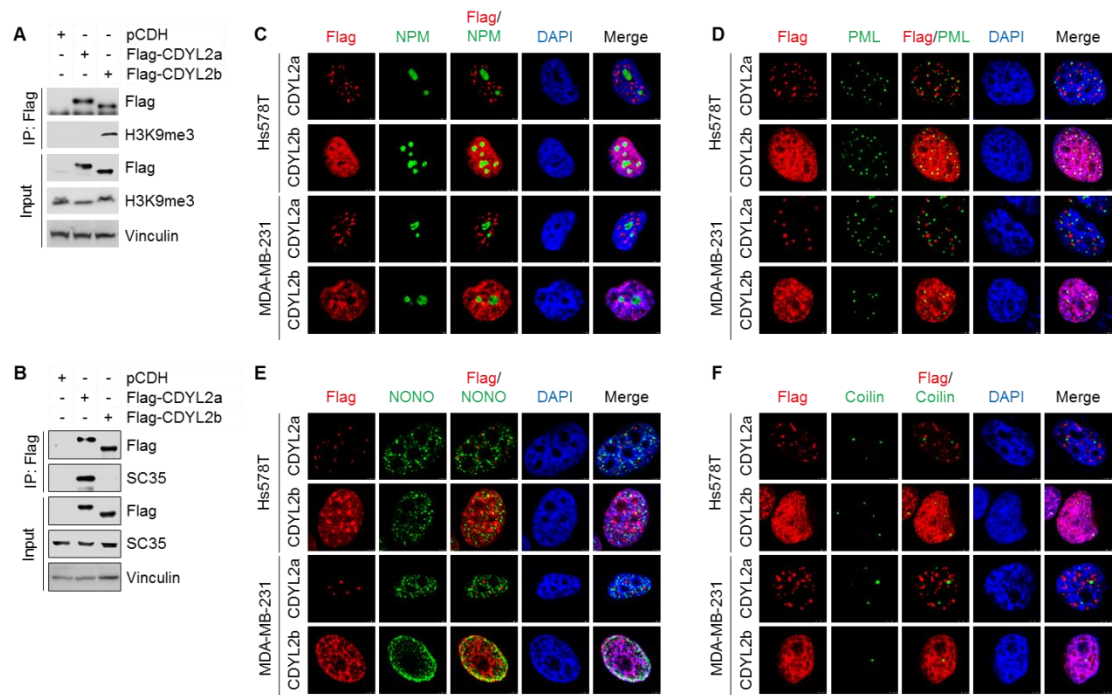

**Figure S11. Subcellular localization of CDYL2a and CDYL2b**

(A-B) HEK293T cells were transfected with pCDH, Flag-CDYL2a, or Flag-CDYL2b. After 48 h of transfection, cells were subjected to sequential IP and immunoblotting analyses with the indicated antibodies.

(C-F) MDA-MB-231 and Hs578T cells stably expressing pCDH, Flag-CDYL2a, or Flag-CDYL2b were stained with Flag (red), nucleophosmin (NPM) (C), promyelocytic leukemia (PML) (D), non-POU domain-containing octamer-binding protein (NONO) (E), and Coilin (F) by immunofluorescence. DNA was counterstained with DAPI.

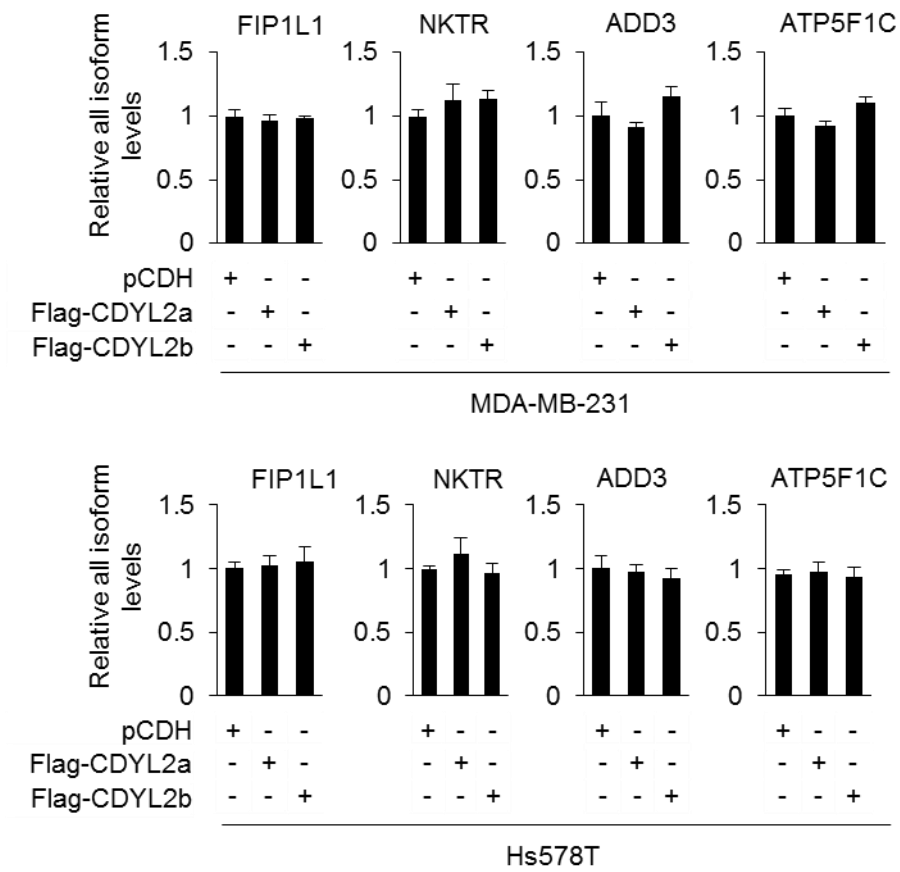

**Figure S12. qPCR analysis of all isoform levels of FIP1L1, NKTR, ADD3, and ATP5FC1 genes in MDA-MB-231 and Hs578T cells stably expressing pCDH, Flag-CDYL2a, or Flag-CDYL2b**

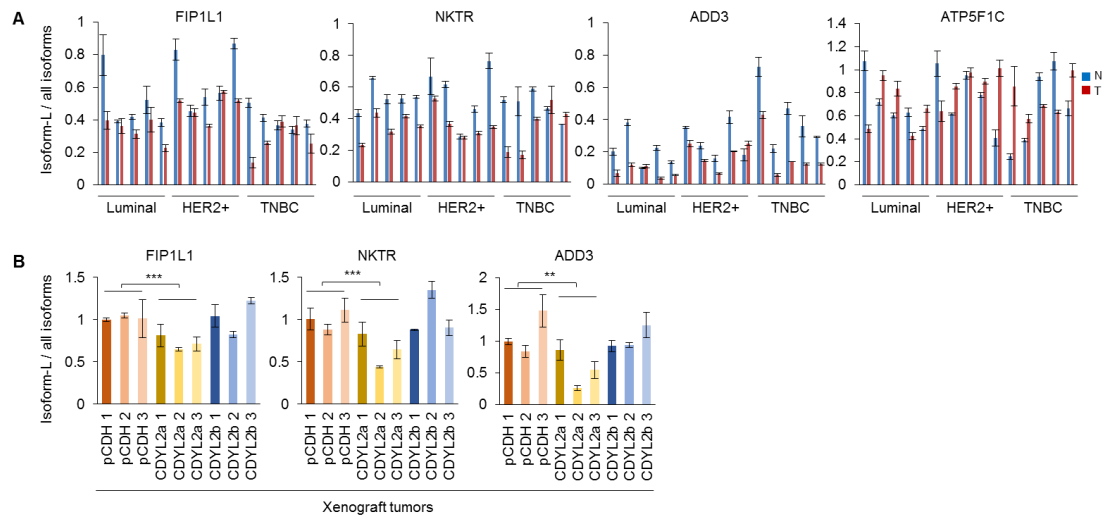

**Figure S13. CDYL2a regulates alternative splicing of FIP1L1, NKTR, and ADD3 genes**

(A) qPCR analysis was carried out with isoform-specific primers using 15 pairs of matched primary breast tumors and normal breast tissues. The ratio of the L isoforms to all isoforms of FIP1L1, NKTR, ADD3, and ATP5FC1 genes is shown.

(B) qPCR analysis was carried out with isoform-specific primers using tumor samples from xenograft tumor models shown in Fig.2E. The ratio of the L isoforms to all isoforms of FIP1L1, NKTR, and ADD3 genes is shown. \*\* $p < 0.01$ ; \*\*\* $p < 0.001$ .

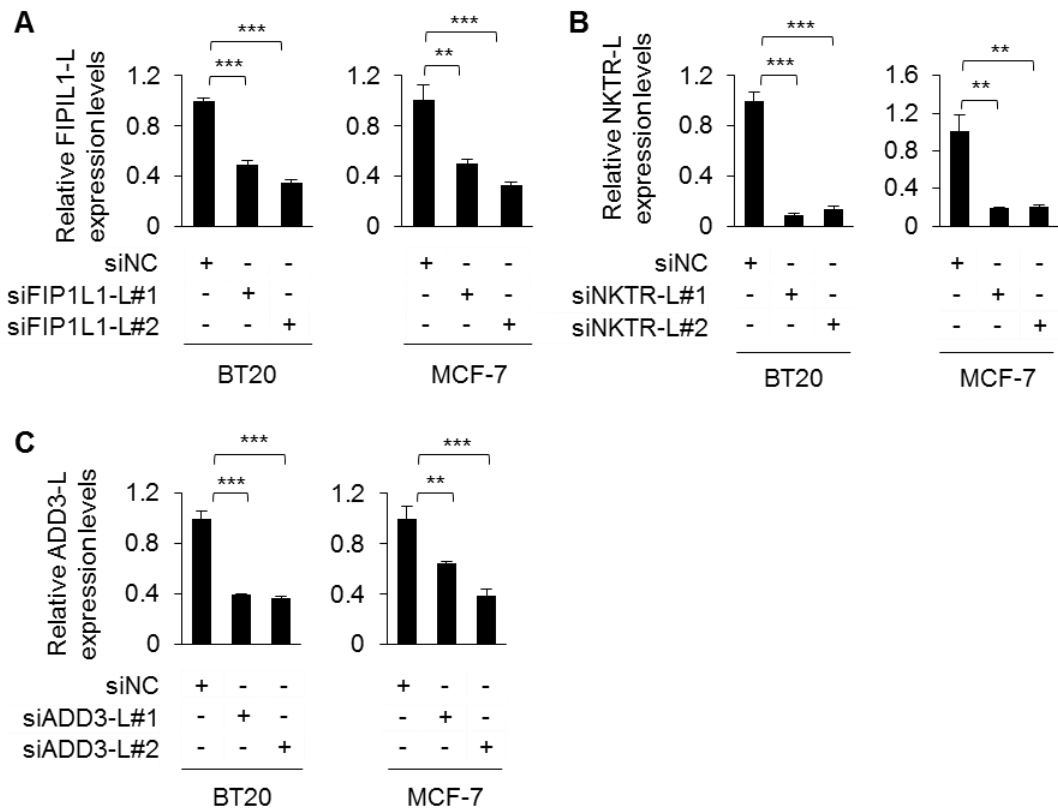

**Figure S14. qPCR analysis of the L isoform expression levels of FIP1L1, NKTR, and ADD3 genes in BT20 and MCF-7 cells that were transfected with indicated siRNAs. \*\* $p < 0.01$ ; \*\*\* $p < 0.001$ .**

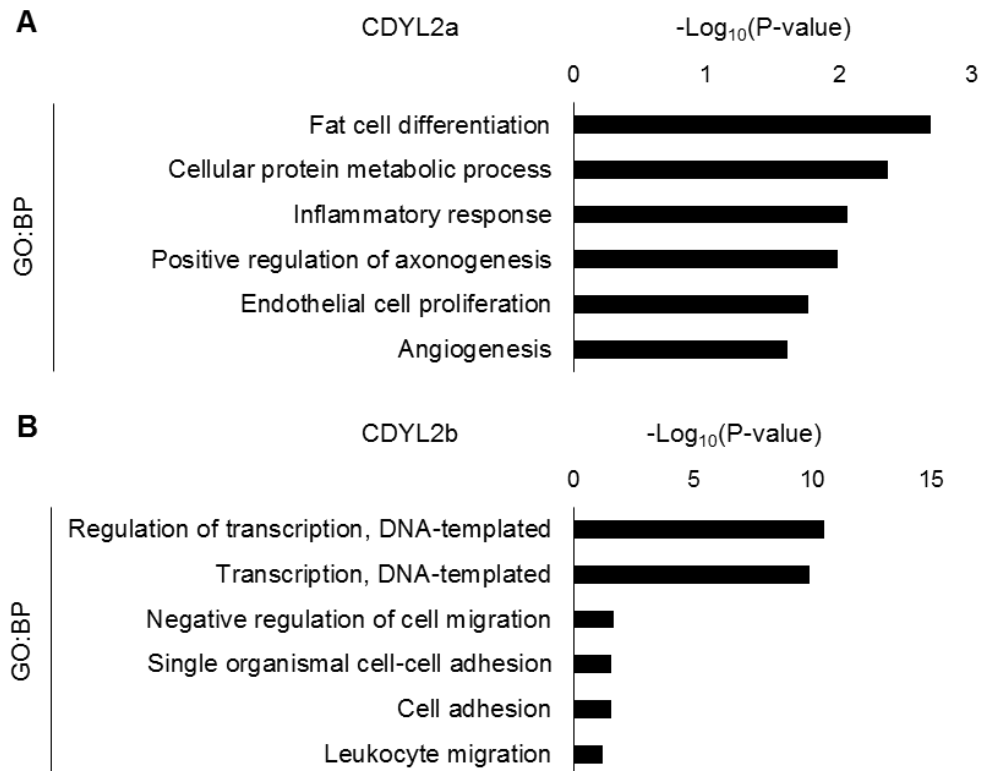

**Figure S15. Gene ontology (GO) enrichment analysis of altered genes only in CDYL2a (A) or CDYL2b (B) overexpressing cells**

BP, biological process

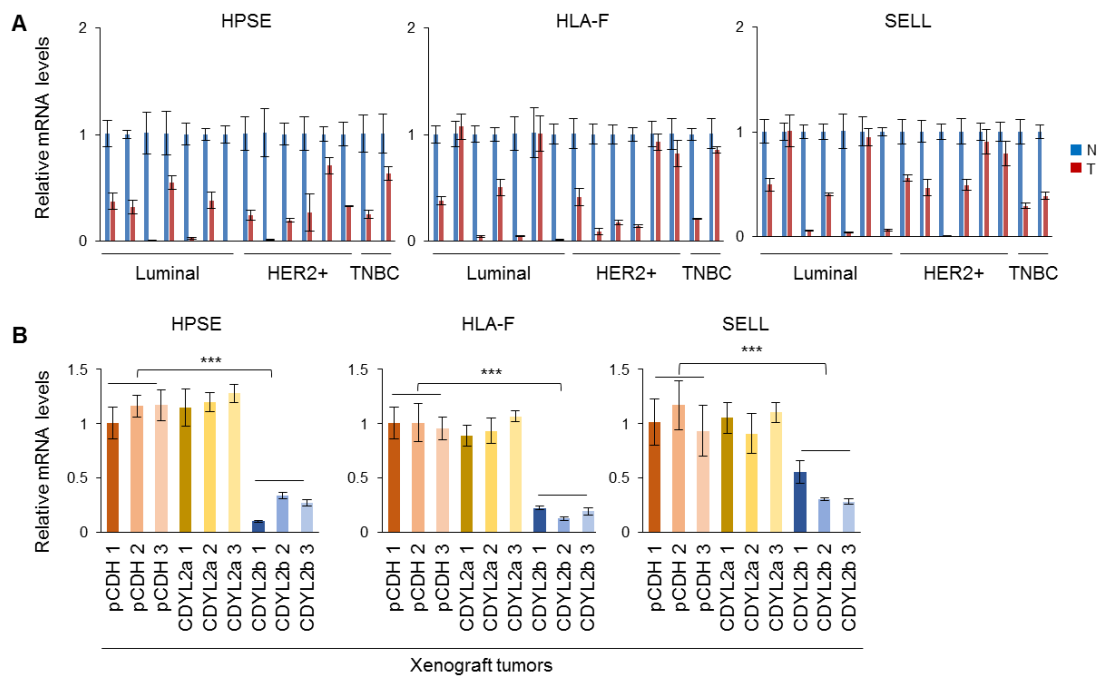

**Figure S16. CDYL2b represses HPSE, HLA-F, and SELL expression**

(A) qPCR analysis of HPSE, HLA-F, and SELL expression in 15 pairs of matched primary breast tumors and normal breast tissues. The expression levels of HPSE, HLA-F, or SELL in normal tissues were used as a control after normalization to the GAPDH levels.

(B) qPCR analysis of HPSE, HLA-F, and SELL expression in xenograft tumor samples from xenograft tumor models shown in Fig.2E. \*\*\* $p < 0.001$ .

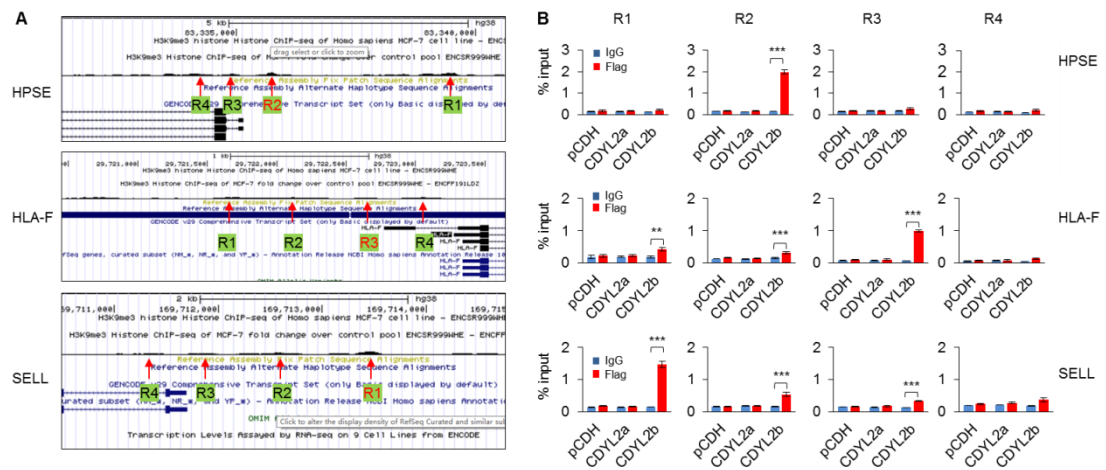

**Figure S17. CDYL2b is enriched in the promoter regions of HPSE, HLA-F, and SELL**

(A) The H3K9me3 enrichment region at HPSE, HLA-F, and SELL promoters in UCSC database.

(B) ChIP-qPCR analysis of the enrichment of CDYL2a or CDYL2b on the promoter regions of HPSE, HLA-F, and SELL genes in the presence of high H3K9me3 levels.

\*\*  $p < 0.01$ ; \*\*\*  $p < 0.001$ .

## Supplementary Tables

**Table S1. Information for expression vectors used in this study**

| Plasmids         | Sources                          | Vectors               |
|------------------|----------------------------------|-----------------------|
| pCDH-Flag-CDYL2a | Subcloned                        | pCDH-CMV-MCS-EF1-Puro |
| pCDH-Flag-CDYL2b | Subcloned                        | pCDH-CMV-MCS-EF1-Puro |
| pLVX-Flag-CDYL2a | Subcloned                        | pLVX-IRES-Neo         |
| pLVX-Flag-CDYL2b | Subcloned                        | pLVX-IRES-Neo         |
| pLVX-HA-HPSE     | Subcloned                        | pLVX-IRES-Neo         |
| pLVX-HA-HLA-F    | Subcloned                        | pLVX-IRES-Neo         |
| pLVX-HA-SELL     | Subcloned                        | pLVX-IRES-Neo         |
| shCDYL2#1        | Subcloned                        | pLKO.1-TRC            |
| shCDYL2#5        | Subcloned                        | pLKO.1-TRC            |
| CDYL2b           | Vigene Bioscience<br>(#CH869225) | pEnter                |
| HPSE             | Vigene Bioscience<br>(#CH806645) | pEnter                |
| HLA-F            | Vigene Bioscience<br>(#CH864022) | pEnter                |
| SELL             | Vigene Bioscience<br>(#CH832492) | pEnter                |

**Table S2. Primers used for molecular cloning of expression vectors**

| Expression vectors | Primers           | Sequences                                                  |
|--------------------|-------------------|------------------------------------------------------------|
| shCDYL2#1          | Forward           | CCGGGGATTGTAGACAAGAGGAACTCGAGTTC<br>CTCTTGTCTACAATCCTTTTTG |
|                    | Reverse           | AATTCAAAAAGGATTGTAGACAAGAGGAACTCG<br>AGTTCCTCTTGTCTACAATCC |
| shCDYL2#5          | Forward           | CCGGGGAAGCTGGAAGCGGAGAACTCGAGTT<br>CTCCGCTTCCAGCTTCCTTTTTG |
|                    | Reverse           | AATTCAAAAAGGAAGCTGGAAGCGGAGAACTC<br>GAGTTCTCCGCTTCCAGCTTCC |
| pCDH-Flag-CDYL2a   | Forward           | GATTACAAGGATGACGACGATAAGATGGGCCAT<br>TTCATCCTTCC           |
|                    | Forward<br>middle | GAGGTTGAAAGGATTGTAGACAAG                                   |
|                    | Reverse           | ATCCTTCGCGGCCGCGGATCCTCAGACTTCATA<br>AATTTTGCCTGCAGG       |
| pCDH-Flag-CDYL2b   | Forward           | GATTACAAGGATGACGACGATAAGATGGCTTCT<br>GGGGACCTTTAC          |
|                    | Reverse           | ATCCTTCGCGGCCGCGGATCCTCAGACTTCATA<br>AATTTTGCCTGCAGG       |
| pLVX-Flag-CDYL2a   | Forward           | GATTACAAGGATGACGACGATAAGATGGGCCAT<br>TTCATCCTTCC           |
|                    | Reverse           | ATCCTTCGCGGCCGCGGATCCTCAGACTTCATA<br>AATTTTGCCTGCAGG       |
| pLVX-Flag-CDYL2b   | Forward           | GATTACAAGGATGACGACGATAAGATGGCTTCT<br>GGGGACCTTTAC          |
|                    | Reverse           | ATCCTTCGCGGCCGCGGATCCTCAGACTTCATA<br>AATTTTGCCTGCAGG       |
| pLVX-HA-HPSE       | Forward           | CGGAATTCGCCACCATGCTGCTGCGCTCGAAG                           |
|                    | Reverse           | CTGGGACGTCGTATGGGTATCCGATGCAAGCA                           |

---

|                    |         |                                                      |
|--------------------|---------|------------------------------------------------------|
|                    |         | GCAACTTTGG                                           |
| pLVX-HA-HLA-F      | Forward | CGGAATTCGCCACCATGGCGCCCCGAAGC                        |
|                    | Reverse | CTGGGACGTCGTATGGGTATCCCACTGCAGCC<br>TGAGAGTAGCTC     |
| pLVX-HA-SELL       | Forward | CGGAATTCGCCACCATGATATTTCCATGGAAATG<br>TCAGAG         |
|                    | Reverse | CTGGGACGTCGTATGGGTATCCATATGGGTCAT<br>TCATACTTCTCTTGG |
| pLVX-CDYL2         | Forward | GTCCAGTGAAGAGAAAATTAGAGGCTGAAAAG                     |
| samesence mutation |         | GAC                                                  |
|                    | Reverse | GACGTAGTCCTTTTCAGCCTCTAATTTTCTCTTC<br>A              |

---

**Table S3. The sequences of siRNAs used in this study**

| siRNAs     | Target sequences (5'-3') |
|------------|--------------------------|
| siFIP1L1#1 | GTATTCCAATAACTGTACC      |
| siFIP1L1#2 | TCCAATAACTGTACCACCT      |
| siNKTR #1  | GAATGTGGTCTTTTGCAAA      |
| siNKTR #2  | GAGAATGTGGTCTTTTGCA      |
| siADD3 #1  | GCTTCATCTGTTTCACAAA      |
| siADD3 #2  | CAAACCTCAGTCACCGCAAA     |
| siADD3 #3  | CGCAAAATGTCCCTGAAAA      |

**Table S4. Primers for qPCR, conventional RT-PCR, and ChIP-qPCR analysis**

| Genes         | Primers | Sequences                |
|---------------|---------|--------------------------|
| CDYL2a        | Forward | ATTTTCATCCTTCCTCCCTGTG   |
|               | Reverse | GTTCTTCCTCTTGTCTACAATCCT |
| CDYL2b        | Forward | CCTGGCATGGCTTCTGG        |
|               | Reverse | CCATCGGATAAGATACTCCCATT  |
| CDYL2c        | Forward | TGGGAAGGTGACCCTTAGT      |
|               | Reverse | CCATCGGATAAGATACTCCCATT  |
| CDYL2d        | Forward | AGGAGGCCACAGTCTAGTT      |
|               | Reverse | AGCCTTTCCATCGGATAAGATAC  |
| HPSE          | Forward | TCCTGCGTACCTGAGGTTTG     |
|               | Reverse | CCATTCCAACCGTAACTTCTCCT  |
| HLA-F         | Forward | TGGCCCTGACCGATACTTG      |
|               | Reverse | GCAGGAATTGCGTGTCGTC      |
| SELL          | Forward | ACCCAGAGGGACTTATGGAAC    |
|               | Reverse | GCAGAATCTTCTAGCCCTTTGC   |
| FIP1L1        | Forward | CCAATAACTGTACCACCTCCAG   |
| exon-specific | Reverse | CACGTGCAGAACGACTATCA     |
| FIP1L1        | Forward | GAGAACAGCAACATACAGGTCC   |
| all isoforms  | Reverse | GAATCAGAGGTGGAGCAGTGC    |
| FIP1L1        | Forward | GAGAACAGCAACATACAGGTCC   |
| trans exon    | Reverse | CACGTGCAGAACGACTATCA     |
| NKTR          | Forward | GCTTGTGCTCAGGAGAGAAA     |
| exon-specific | Reverse | TGCAAAAGACCACATTCTCTT    |
| NKTR          | Forward | GCTTGTGCTCAGGAGAGAAA     |
| all isoforms  | Reverse | CCACACGATGGAACGTAGAA     |
| NKTR          | Forward | GCTTGTGCTCAGGAGAGAAA     |

---

|               |         |                               |
|---------------|---------|-------------------------------|
| trans exon    | Reverse | CTTCAAACCAGAAATAACCACT        |
| ADD3          | Forward | TTCAGTCTCAAACCTCAGTCACC       |
| exon-specific | Reverse | AGACTTAATAGTAATCTCGATGTTTTCTA |
| ADD3          | Forward | GGTAGTAAATGGCAAGGATGATAT      |
| all isoforms  | Reverse | AGACTTAATAGTAATCTCGATGTTTTCTA |
| ADD3          | Forward | TCAAATACATGGCACAGAGGC         |
| trans exon    | Reverse | TTACTACCATGACAGGCACTTC        |
| ATP5F1C       | Forward | GTGCTGACAGCATGAGTATCTATGAC    |
| exon-specific | Reverse | GAGGATGGAACCTTGATTTTCATTAA    |
| ATP5F1C       | Forward | GTGCTGACAGCATGAGTATCTATGAC    |
| all isoforms  | Reverse | GCTGCAGCACCAGAGATAA           |
| ATP5F1C       | Forward | GTGCTGACAGCATGAGTATCTATGAC    |
| trans exon    | Reverse | CTTCGGACAAAGGCAGCAGTA         |
| HPSE ChIP 1   | Forward | GCTCAGCAATGTTTGTTCTCTAC       |
|               | Reverse | GGTGTGTGAGAGCATGGATAG         |
| HPSE ChIP 2   | Forward | GAACTTCACATCCCGATTCT          |
|               | Reverse | ACTTGTGTTCTCTTCCCTTCTC        |
| HPSE ChIP 3   | Forward | GGAAAGCGAGCAAGGAAGTA          |
|               | Reverse | ATCCCTCCCACTCCTCTTC           |
| HPSE ChIP 4   | Forward | TTCTCATCCCTCATCCCTCTC         |
|               | Reverse | TTTAGAGTGGGCGCTAAACAA         |
| HLA-F ChIP 1  | Forward | TTTGACTCACAGTAGCAGGAC         |
|               | Reverse | CCACTCTGTCACTCCTGAATAG        |
| HLA-F ChIP 2  | Forward | GGTGGCTCATGCCTGTAAT           |
|               | Reverse | ACGGGTTTCACCGTGTTAG           |
| HLA-F ChIP 3  | Forward | GAAACTGGTCTCTGTCCTATTTCA      |
|               | Reverse | TCTCCTTCTCCTTCTCCTTCTC        |

---

---

|              |         |                         |
|--------------|---------|-------------------------|
| HLA-F ChIP 4 | Forward | TCAATCAAGGGACTGGGATTT   |
|              | Reverse | CTCAATGTCTCCCTGAGTCTTC  |
| SELL ChIP 1  | Forward | TACTGTGCAGAAGCTCTTTAGTT |
|              | Reverse | GGACGTAGGTATGGGCAAAG    |
| SELL ChIP 2  | Forward | GGATGAAGCCAACTTGATTGTG  |
|              | Reverse | CAGGCCAATATCCCTGATGAA   |
| SELL ChIP 3  | Forward | GCGCTGAGCTTCAGAGTTT     |
|              | Reverse | GACCCACTGATGTGAGTCAATG  |
| SELL ChIP 4  | Forward | GGAAGAAGAACAGCAACAACAA  |
|              | Reverse | TCTCTTCCTTCCCTCCTTTCTA  |

---

**Table S5. Information for primary antibodies used in this study**

| Antibodies   | Vendors       | Cat#        |
|--------------|---------------|-------------|
| CDYL         | Proteintech   | 17763-1-AP  |
| CDYL2        | Abcam         | ab183854    |
| H3K9me3      | Abcam         | ab176916    |
| HP1 $\alpha$ | Abcam         | ab109028    |
| Fibrillarin  | Abcam         | ab166630    |
| SC35         | Abcam         | ab11826     |
| SC35         | Abcam         | ab204916    |
| NPM          | Bethyl        | A302-404A   |
| PML          | Abcam         | ab179466    |
| NONO         | Abcam         | ab133574    |
| Coilin       | Abcam         | ab87913     |
| Flag         | Abcam         | ab205606    |
| Flag         | Sigma-Aldrich | F1804/F3165 |
| Vinculin     | Sigma-Aldrich | V9131       |
| HA           | CST           | 3724S       |
